# Supplementary material
Source: publisher site journal article supplement (https://www.dovepress.com/article/535293)
Supplement: Supplementary file 1 [file 535293%20Supplementary%20file.pdf]

## Supplementary Material

### External validation of the Saga Fall-related Injury Risk Model and exploration of common factors in multiple hospitals: A retrospective observational study

Shizuka Yaita<sup>1,2</sup>, Naoko E. Katsuki<sup>1</sup>, Risa Hirata<sup>1</sup>, Eiji Nakatani<sup>3</sup>, Midori Tokushima<sup>1</sup>, Toru Oishi<sup>1</sup>, Tomoyo Nishi<sup>1</sup>, Masahiko Ezo<sup>1</sup>, Hitomi Shimada<sup>4</sup>, Chihiro Saito<sup>5</sup>, Kaori Amari<sup>6</sup>, Kazuya Kurogi<sup>7</sup>, Yoshimasa Oda<sup>8</sup>, Maiko Ono<sup>9</sup>, Mariko Yoshimura<sup>10</sup>, Kiyoshi Shikino<sup>11, 12</sup>, Shun Yamashita<sup>1,2</sup>, Yoshinori Tokushima<sup>1</sup>, Hidetoshi Aihara<sup>1</sup>, Masaki Tago<sup>1</sup>

<sup>1</sup> Department of General Medicine, Saga University Hospital, Saga, Japan; <sup>2</sup> Education and Research Center for Community Medicine, Saga University Faculty of Medicine, Saga, Japan; <sup>3</sup> Department of Biostatistics and Health Data Science, Graduate School of Medical Science Nagoya City University, Nagoya, Japan; <sup>4</sup> Shimada Hospital of Medical Corporation Chouseikai, Saga, Japan; <sup>5</sup> Department of Nursing, Shizuoka General Hospital, Shizuoka, Japan; <sup>6</sup> Clinical Education Center, Saga-Ken Medical Centre Koseikan, Saga, Japan; <sup>7</sup> Department of General Medicine, National Hospital Organization Ureshino Medical Center, Ureshino, Japan; <sup>8</sup> Department of General Medicine, Yuai-Kai Foundation and Oda Hospital, Kashima, Japan; <sup>9</sup> Department of General Medicine, Karatsu Municipal Hospital, Karatsu, Japan; <sup>10</sup> Safety Management Section, Saga University Hospital, Saga, Japan ; <sup>11</sup> Department of General Medicine, Chiba University Hospital, Chiba, Japan; <sup>12</sup> Department of Community-Oriented Medical Education, Chiba University Graduate School of Medicine, Chiba, Japan

Correspondence: Masaki Tago, Department of General Medicine, Saga University Hospital, 5-1-1 Nabeshima, Saga 849-8501, Japan. Tel (optional) +81 952 34 3238. Fax (optional) +81 952 34 2029. Email (mandatory) [tagomas@cc.saga-u.ac.jp](mailto:tagomas@cc.saga-u.ac.jp)

## Supplementary Figures

Figure S1. Flowchart of Bedriddenness ranks.

Bold text indicates the classification labels used in the flowchart. These categories are based on the patient's physical independence and are defined as follows. Normal: Able to live independently without assistance. J: Generally independent, but with some restrictions. A: Able to live inside the home but has difficulty going outside. B: Mostly stays seated in a chair; mobility is significantly limited. C: Lives almost entirely in bed and requires assistance for daily activities.

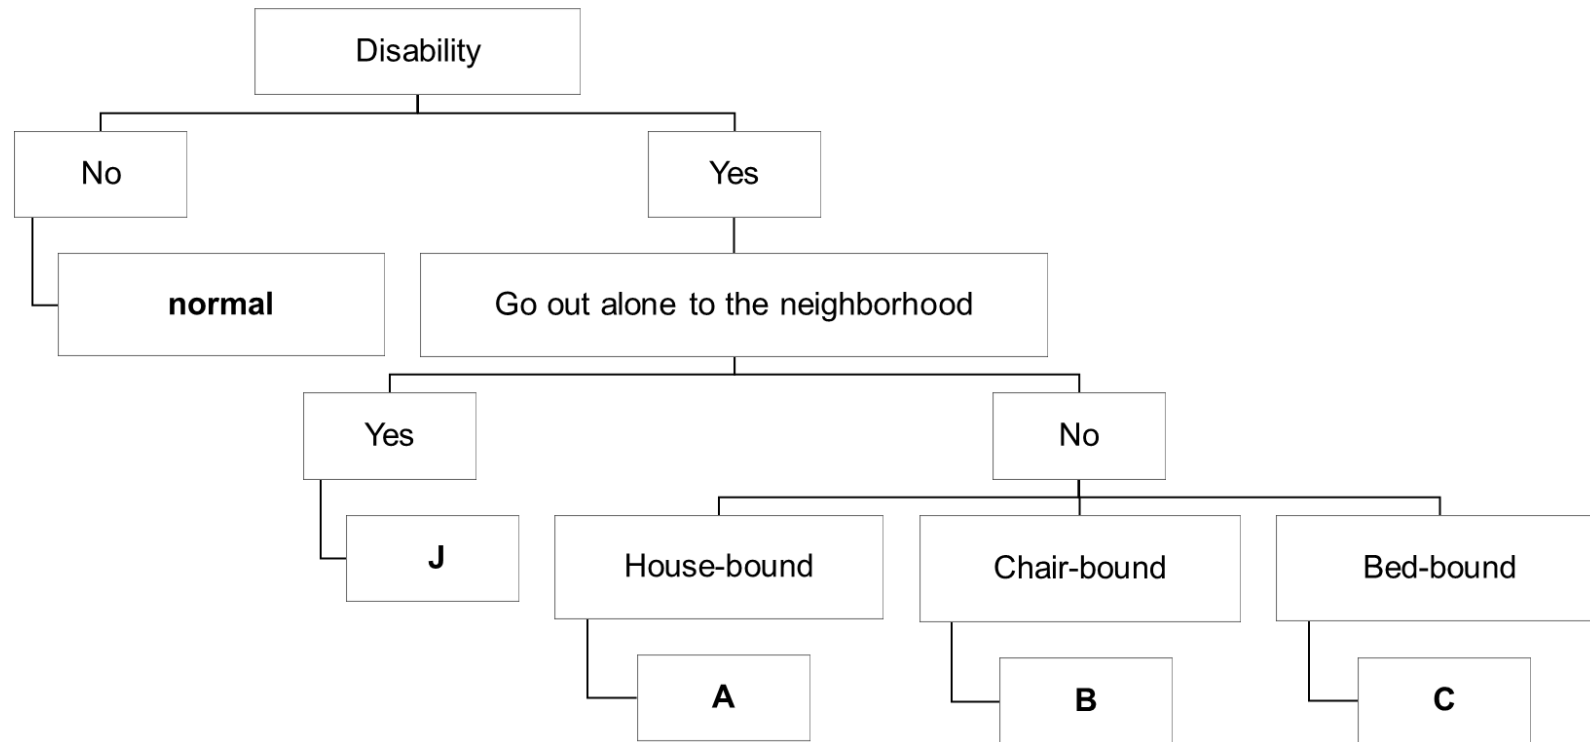

Figure S2. Flowchart of Cognitive function score.

Bold text and bold numerical values indicate the classification labels used in the flowchart. These categories are based on the patient's cognitive status and are defined as follows. Normal: No cognitive impairment. 1: Mild cognitive issues, but the patient remains independent. 2: Requires some attention in daily life. 3: Needs occasional assistance. 4: Requires constant caregiving. M: Needs professional medical treatment due to severe cognitive impairment.

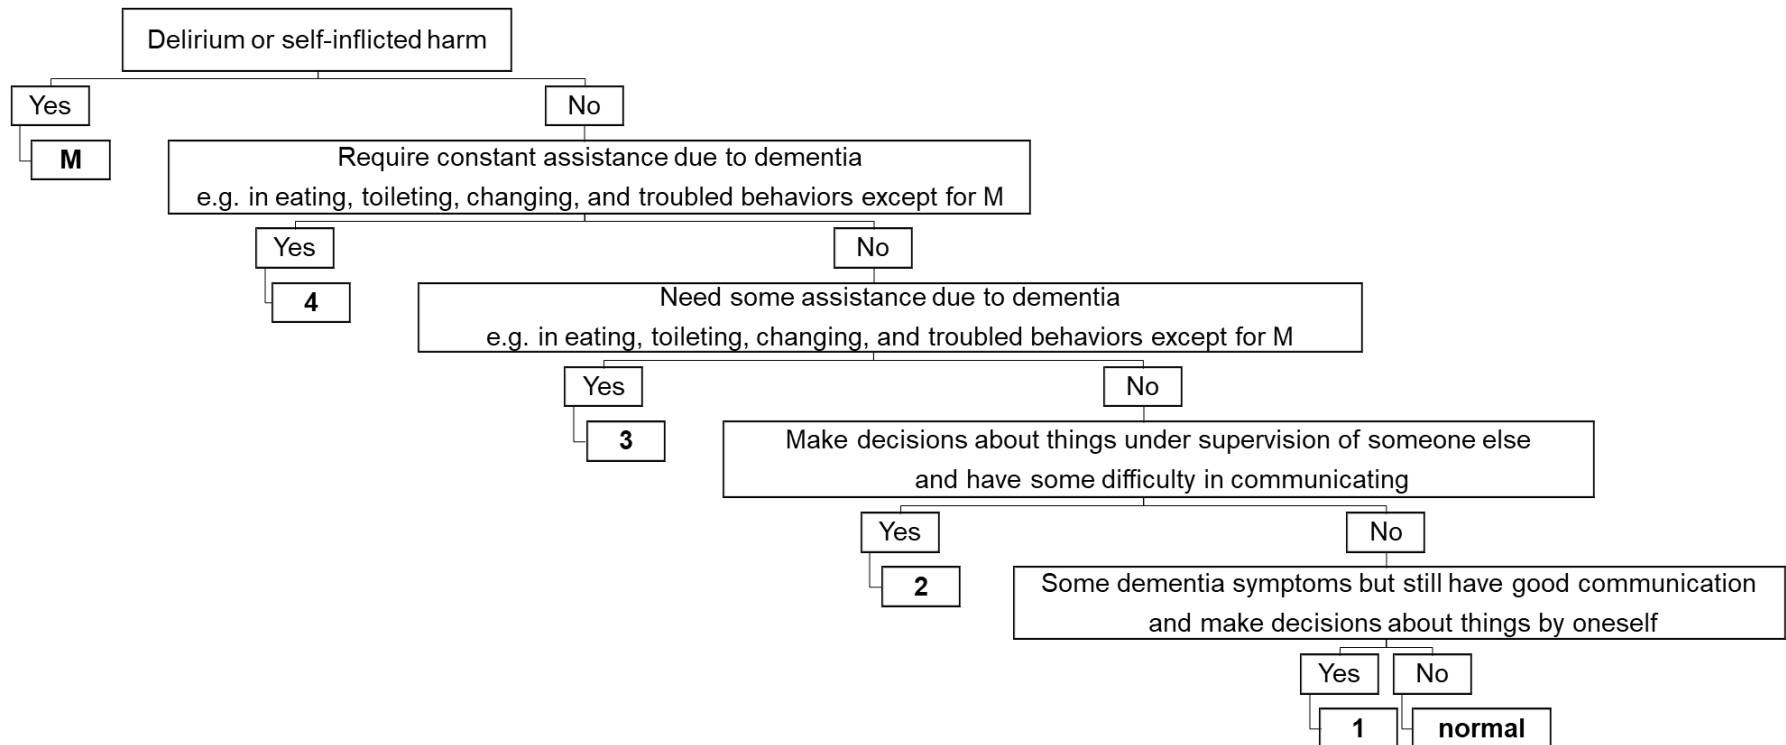

## Supplementary Tables

Table S1. Background of each hospital.

|            | Location                   | Setting  | Hospital<br>beds (beds) | Long term<br>care beds<br>(beds) | Psychiatric<br>beds (beds) | Tuberculo-<br>sis beds<br>(beds) | Number of<br>departments | Annual<br>emergency<br>transports | Mean length<br>of hospital<br>stay (days) | Number of<br>available<br>patients | Fall rate<br>(%) | With fall In-<br>jury rate<br>(%) |
|------------|----------------------------|----------|-------------------------|----------------------------------|----------------------------|----------------------------------|--------------------------|-----------------------------------|-------------------------------------------|------------------------------------|------------------|-----------------------------------|
| Hospital A | Saga city,<br>Saga         | tertiary | 604                     | NA                               | 24                         | NA                               | 31                       | 2471                              | 11.9                                      | 28514                              | 1.8              | 1.5 <sup>a</sup>                  |
| Hospital B | Shizuoka city,<br>Shizuoka | tertiary | 712                     | NA                               | NA                         | 50                               | 31                       | 5094                              | 11.2                                      | 41416                              | 2.7              | 1.6 <sup>a</sup>                  |
| Hospital C | Ureshino city,<br>Saga     | tertiary | 399                     | NA                               | NA                         | NA                               | 24                       | 2376                              | 13                                        | 14362                              | 3.3              | 1.1 <sup>a</sup>                  |
| Hospital D | Saga city,<br>Saga         | tertiary | 450                     | NA                               | NA                         | NA                               | 35                       | 2764                              | 10.4                                      | 30677                              | 1.6              | 1.4 <sup>a</sup>                  |
| Hospital E | Kashima city,<br>Saga      | acute    | 111                     | NA                               | NA                         | NA                               | 10                       | 729                               | 12.6                                      | 8370                               | 3.1              | 2.4 <sup>a</sup>                  |
| Hospital F | Karatsu city,<br>Saga      | chronic  | 56                      | 56                               | NA                         | NA                               | 5                        | 51                                | 88.2                                      | 661                                | 19.5             | 15.3 <sup>a</sup>                 |
| Hospital G | Isumi city,<br>Chiba       | chronic  | 144                     | 48                               | 4                          | NA                               | 14                       | 1700                              | 17                                        | 395                                | 0.5              | 0.3 <sup>a</sup>                  |

|            |                    |         |    |    |    |    |   |   |     |     |     |                  |
|------------|--------------------|---------|----|----|----|----|---|---|-----|-----|-----|------------------|
| Hospital H | Saga city,<br>Saga | chronic | 84 | 84 | NA | NA | 3 | 0 | 613 | 126 | 7.9 | 0.8 <sup>a</sup> |
|------------|--------------------|---------|----|----|----|----|---|---|-----|-----|-----|------------------|

NA: not applicable

This table was prepared by Tago M, Hirata R, Katsuki NE, et al. Validation and Improvement of the Saga Fall Risk Model: A Multicenter Retrospective Observational Study. *Clin Interv Aging*. 2024;19:175-188. Published 2024 Feb 7. Table S1 in doi:10.2147/CIA.S441235 was partially modified in the order of hospitals in this study.

<sup>a</sup> The data were calculated from the data collected in this study and added.

Table S2. All patients' backgrounds with or without fall and p value in univariate analysis.

| Variable, Category (Reference)     | All<br>n=144777 | With fall injury<br>n=2247 | Without fall injury <sup>a</sup><br>n=142530 | p value <sup>b</sup> |
|------------------------------------|-----------------|----------------------------|----------------------------------------------|----------------------|
| Age, years                         | 70 (58-79)      | 77 (69-85)                 | 70 (58-79)                                   | <0.001               |
| Sex, Male (Female)                 | 76742 (53)      | 1300 (58)                  | 75442 (53)                                   | <0.001               |
| Department, Internal Medicine      | 67535 (47)      | 1217 (54)                  | 66318 (47)                                   | <0.001               |
| Department, Neurosurgery           | 4878 (3)        | 124 (6)                    | 4754 (3)                                     |                      |
| Department, Others                 | 72363 (50)      | 906 (40)                   | 71457 (50)                                   |                      |
| Department, Missing                | 1 (0)           | 0 (0)                      | 1 (0)                                        |                      |
| Type of admission, Planed          | 89657 (62)      | 991 (44)                   | 88666 (62)                                   | <0.001               |
| Type of admission, Unplanned       | 53386 (37)      | 1246 (56)                  | 52140 (37)                                   |                      |
| Type of admission, Missing         | 1734 (1)        | 10 (0)                     | 1724 (1)                                     |                      |
| Emergency transport, Present       | 17759 (12)      | 429 (19)                   | 17330 (12)                                   | <0.001               |
| Emergency transport, Absent        | 125501 (87)     | 1813 (81)                  | 123688 (87)                                  |                      |
| Emergency transport, Missing       | 1517 (1)        | 5 (0)                      | 1512 (1)                                     |                      |
| Medical referral letter, Present   | 79053 (55)      | 1215 (54)                  | 77838 (55)                                   | 0.850                |
| Medical referral letter, Absent    | 19850 (14)      | 308 (14)                   | 19542 (14)                                   |                      |
| Medical referral letter, Missing   | 45874 (32)      | 724 (32)                   | 45150 (32)                                   |                      |
| History of falls, Present (Absent) | 10822 (8)       | 494 (22)                   | 10328 (7)                                    | <0.001               |

|                                                 |             |           |             |        |
|-------------------------------------------------|-------------|-----------|-------------|--------|
| Hypnotics usage, Using                          | 20549 (14)  | 509 (23)  | 20040 (14)  | <0.001 |
| Hypnotics usage, Not using                      | 121697 (84) | 1722 (77) | 119975 (84) |        |
| Hypnotics usage, Missing                        | 2531 (2)    | 16 (1)    | 2515 (2)    |        |
| Antipsychotic drug usage, Using                 | 9371 (7)    | 367 (16)  | 9004 (6)    | <0.001 |
| Antipsychotic drugs usage, Not using            | 132875 (92) | 1864 (83) | 131011 (92) |        |
| Antipsychotic drugs usage, Missing              | 2531 (2)    | 16 (1)    | 2515 (2)    |        |
| Walking aids usage, Using                       | 10681 (7)   | 458 (20)  | 10223 (7)   | <0.001 |
| Walking aids usage, Not using                   | 41610 (29)  | 459 (20)  | 41151 (29)  |        |
| Walking aids usage, Missing                     | 92486 (64)  | 1330 (59) | 91156 (64)  |        |
| Disturbance of consciousness, Present           | 14425 (10)  | 490 (22)  | 13935 (10)  | <0.001 |
| Disturbance of consciousness, Absent            | 123981 (86) | 1616 (72) | 122365 (86) |        |
| Disturbance of consciousness, Missing           | 6371 (4)    | 141 (6)   | 6230 (4)    |        |
| Visual impairment, Present                      | 11079 (8)   | 236 (11)  | 10843 (8)   | <0.001 |
| Visual impairment, Absent                       | 57035 (39)  | 845 (38)  | 56190 (39)  |        |
| Visual impairment, Missing                      | 76663 (53)  | 1166 (52) | 75497 (53)  |        |
| Ophthalmological disease <sup>c</sup> , Present | 17621 (12)  | 316 (14)  | 17305 (12)  | <0.001 |
| Ophthalmological disease <sup>c</sup> , Absent  | 118722 (82) | 1728 (77) | 116994 (82) |        |
| Ophthalmological disease <sup>c</sup> , Missing | 8434 (6)    | 203 (9)   | 8231 (6)    |        |
| Parkinsonism, Present                           | 1535 (1)    | 54 (2)    | 1481 (1)    | <0.001 |

|                                     |             |           |             |        |
|-------------------------------------|-------------|-----------|-------------|--------|
| Parkinsonism, Absent                | 143220 (99) | 2192 (98) | 141028 (99) |        |
| Parkinsonism, Missing               | 22 (0)      | 1 (0)     | 21 (0)      |        |
| Permanent damage by stroke, Present | 11764 (8)   | 310 (14)  | 11454 (8)   | <0.001 |
| Permanent damage by stroke, Absent  | 132991 (92) | 1936 (86) | 131055 (92) |        |
| Permanent damage by stroke, Missing | 22 (0)      | 1 (0)     | 21 (0)      |        |
| Paraplegia and hemiplegia, Present  | 974 (1)     | 44 (2)    | 930 (1)     | <0.001 |
| Paraplegia and hemiplegia, Absent   | 143781 (99) | 2202 (98) | 141579 (99) |        |
| Paraplegia and hemiplegia, Missing  | 22 (0)      | 1 (0)     | 21 (0)      |        |
| Alcoholism, Present                 | 801 (1)     | 31 (1)    | 770 (1)     | <0.001 |
| Alcoholism, Absent                  | 143954 (99) | 2215 (99) | 141739 (99) |        |
| Alcoholism, Missing                 | 22 (0)      | 1 (0)     | 21 (0)      |        |
| Diabetes mellitus, Present (Absent) | 44099 (31)  | 860 (38)  | 43239 (30)  | <0.001 |
| Frequent urination, Present         | 23903 (17)  | 460 (21)  | 23443 (16)  | <0.001 |
| Frequent urination, Absent          | 61159 (42)  | 817 (36)  | 60342 (42)  |        |
| Frequent urination, Missing         | 59715 (41)  | 970 (43)  | 58745 (41)  |        |
| Eating, Independent                 | 115269 (80) | 1338 (60) | 113931 (80) | <0.001 |
| Eating, Requiring assistance        | 27593 (19)  | 882 (40)  | 26711 (19)  |        |
| Eating, Missing                     | 1915 (1)    | 27 (1)    | 1888 (1)    |        |
| Grooming, Independent               | 95711 (66)  | 1073 (48) | 94638 (66)  | <0.001 |

|                                       |             |           |             |        |
|---------------------------------------|-------------|-----------|-------------|--------|
| Grooming, Requiring assistance        | 25647 (18)  | 885 (39)  | 24762 (17)  |        |
| Grooming, Missing                     | 23419 (16)  | 289 (13)  | 23130 (16)  |        |
| Dressing, Independent                 | 105763 (73) | 996 (44)  | 104767 (74) | <0.001 |
| Dressing, Requiring assistance        | 34615 (24)  | 1192 (53) | 33423 (23)  |        |
| Dressing, Missing                     | 4399 (3)    | 59 (3)    | 4340 (3)    |        |
| Swallowing, Independent               | 116732 (81) | 1736 (77) | 114996 (81) | <0.001 |
| Swallowing, Requiring assistance      | 3770 (3)    | 241 (11)  | 3529 (3)    |        |
| Swallowing, Missing                   | 24275 (17)  | 270 (12)  | 24005 (17)  |        |
| Toileting, Independent                | 91671 (63)  | 908 (40)  | 90763 (64)  | <0.001 |
| Toileting, Requiring assistance       | 48622 (34)  | 1278 (57) | 47344 (33)  |        |
| Toileting, Missing                    | 4484 (3)    | 61 (3)    | 4423 (3)    |        |
| Bladder control, Independent          | 116962 (81) | 1333 (59) | 115629 (81) | <0.001 |
| Bladder control, Requiring assistance | 22905 (16)  | 838 (37)  | 22067 (16)  |        |
| Bladder control, Missing              | 4910 (3)    | 76 (3)    | 4834 (3)    |        |
| Bowel control, Independent            | 115158 (80) | 1267 (56) | 113891 (80) | <0.001 |
| Bowel control, Requiring assistance   | 24761 (17)  | 907 (40)  | 23854 (17)  |        |
| Bowel control, Missing                | 4858 (3)    | 73 (3)    | 4785 (3)    |        |
| Bathing, Independent                  | 91521 (63)  | 908 (40)  | 90613 (64)  | <0.001 |
| Bathing, Requiring assistance         | 30550 (21)  | 1091 (49) | 29459 (21)  |        |

|                                                           |             |           |             |        |
|-----------------------------------------------------------|-------------|-----------|-------------|--------|
| Bathing, Missing                                          | 22706 (16)  | 248 (11)  | 22458 (16)  |        |
| Taking prescription drugs, Independent                    | 30675 (21)  | 402 (18)  | 30273 (21)  | <0.001 |
| Taking prescription drugs, Requiring assistance           | 6916 (5)    | 365 (16)  | 6551 (5)    |        |
| Taking prescription drugs, Missing                        | 107186 (74) | 1480 (66) | 105706 (74) |        |
| Transferring from wheelchair to bed, Independent          | 89207 (62)  | 884 (39)  | 88323 (62)  | <0.001 |
| Transferring from wheelchair to bed, Requiring assistance | 51672 (36)  | 1313 (58) | 50359 (35)  |        |
| Transferring from wheelchair to bed, Missing              | 3898 (3)    | 50 (2)    | 3848 (3)    |        |
| Mobility on level surfaces, Independent                   | 89573 (62)  | 851 (38)  | 88722 (62)  | <0.001 |
| Mobility on level surfaces, Requiring assistance          | 50033 (35)  | 1317 (59) | 48716 (34)  |        |
| Mobility on level surfaces, Missing                       | 5171 (4)    | 79 (4)    | 5092 (4)    |        |
| Walking up and down stairs, Independent                   | 88724 (61)  | 854 (38)  | 87888 (62)  | <0.001 |
| Walking up and down stairs, Requiring assistance          | 32901 (23)  | 1134 (51) | 31767 (22)  |        |
| Walking up and down stairs, Missing                       | 23134 (16)  | 259 (12)  | 22875 (16)  |        |
| Body Mass Index, <18.5                                    | 18539 (13)  | 504 (22)  | 18035 (13)  | <0.001 |
| Body Mass Index, $\geq 18.5$ and <25                      | 84613 (58)  | 1266 (56) | 83347 (59)  |        |
| Body Mass Index, $\geq 25$                                | 38508 (27)  | 435 (19)  | 38073 (27)  |        |
| Body Mass Index, Missing                                  | 3117 (2)    | 42 (2)    | 3075 (2)    |        |
| Bedriddenness rank <sup>d</sup> , Normal                  | 4913 (3)    | 34 (2)    | 4879 (3)    | <0.001 |

|                                                       |             |            |             |        |
|-------------------------------------------------------|-------------|------------|-------------|--------|
| Bedriddenness rank <sup>d</sup> , J                   | 59317 (41)  | 445 (20)   | 58872 (41)  |        |
| Bedriddenness rank <sup>d</sup> , A                   | 24412 (17)  | 579 (26)   | 23833 (17)  |        |
| Bedriddenness rank <sup>d</sup> , B                   | 13094 (9)   | 479 (21)   | 12615 (9)   |        |
| Bedriddenness rank <sup>d</sup> , C                   | 24276 (17)  | 551 (25)   | 23725 (17)  |        |
| Bedriddenness rank <sup>d</sup> , Missing             | 18765 (13)  | 159 (7)    | 18606 (13)  |        |
| Cognitive function score <sup>e</sup> , Normal        | 109516 (76) | 1422 (63)  | 108094 (76) | <0.001 |
| Cognitive function score <sup>e</sup> , 1             | 6507 (5)    | 214 (10)   | 6293 (4)    |        |
| Cognitive function score <sup>e</sup> , 2             | 3916 (3)    | 157 (7)    | 3759 (3)    |        |
| Cognitive function score <sup>e</sup> , 3             | 4606 (3)    | 259 (12)   | 4347 (3)    |        |
| Cognitive function score <sup>e</sup> , 4             | 1768 (1)    | 65 (3)     | 1703 (1)    |        |
| Cognitive function score <sup>e</sup> , M and Missing | 18464 (13)  | 130 (6)    | 18334 (13)  |        |
| Rehabilitation, Implemented                           | 37607 (26)  | 1396 (62)  | 36211 (25)  | <0.001 |
| Rehabilitation, Not implemented                       | 107167 (74) | 851 (38)   | 106316 (75) |        |
| Rehabilitation, Missing                               | 3 (0)       | 0 (0)      | 3 (0)       |        |
| Surgery, Implemented (Not implemented)                | 40251 (28)  | 510 (23)   | 39741 (28)  | <0.001 |
| Fall protection measures, Implemented                 | 33651 (23)  | 598 (27)   | 33053 (23)  | <0.001 |
| Fall protection measures, Not implemented             | 8056 (6)    | 174 (8)    | 7882 (6)    |        |
| Fall protection measures, Missing                     | 103070 (71) | 1475 (66)  | 101595 (71) |        |
| Length of stay, day                                   | 9 (4-16)    | 26 (15-46) | 9 (4-16)    | 0.237  |

Continuous and categorical variables are presented as median (interquartile range) and frequency (percentage), respectively.

<sup>a</sup> The Without fall-related injury group includes patients who did not fall and patients who fell without injury.

<sup>b</sup> *P*-values were calculated by Mann-Whitney test for continuous variables and chi-squared test for categorical variables.

<sup>c</sup> Ophthalmologic diseases were defined as “yes” if the patient had glaucoma or cataract.

<sup>d</sup> Bedriddenness rank J means a statement of independence/autonomy, A means housebound, B means chair-bound, C means bed-bound.

<sup>e</sup> The cognitive levels are classified into 6 major categories (normal, 1: independence, 2: attention needed, 3: intermittent care needed, 4: continuous care needed, and M: specialized treatment needed).

Table S3. Multivariate analysis results for each hospital (all covariate factors).

| Variable, Category (Reference) |       | hospital A       | hospital B       | hospital C       | hospital D       | hospital E       | hospital F           | hospital G                | hospital H |
|--------------------------------|-------|------------------|------------------|------------------|------------------|------------------|----------------------|---------------------------|------------|
|                                |       | n=36221          | n=45014          | n=22424          | n=31503          | n=8429           | n=661                | n=399                     | n=125      |
| Age,                           | OR    | 1.0 <sup>a</sup> | 1.0 <sup>a</sup> | 1.0 <sup>a</sup> | 1.0 <sup>a</sup> | 1.0              | 1.1 <sup>a</sup>     | 1.6                       | 1.2        |
| years                          | 95%CI | 1.0-1.0          | 1.0-1.0          | 1.0-1.0          | 1.0-1.0          | 1.0-1.0          | 1.0-1.2              | 0.0-318×10 <sup>298</sup> | 0.0        |
| Sex,                           | OR    | 1.0              | 1.4 <sup>a</sup> | 1.0              | 1.3 <sup>a</sup> | 1.6 <sup>a</sup> | 4.0 <sup>a</sup>     | 0.0                       | 40274      |
| Male (Female)                  | 95%CI | 0.8-1.2          | 1.2-1.6          | 0.8-1.3          | 1.0-1.5          | 1.2-2.2          | 1.5-10.3             | 0.0                       | 0.0        |
| Department,                    | OR    | 0.8 <sup>a</sup> | 1.0              | 0.9              | 1.0              | 1.6 <sup>a</sup> | 2237×10 <sup>5</sup> | —                         | —          |
| internal medicine (Others)     | 95%CI | 0.7-1.0          | 0.8-1.1          | 0.7-1.2          | 0.8-1.2          | 1.1-2.3          | 0.0                  | —                         | —          |
| Department,                    | OR    | 1.2              | 1.4              | 1.3              | 1.2              | 3.0 <sup>a</sup> | —                    | —                         | —          |
| neurosurgery (Others)          | 95%CI | 0.8-1.8          | 1.0-1.9          | 0.6-2.6          | 0.7-2.0          | 1.6-5.9          | —                    | —                         | —          |
| Department,                    | OR    | —                | —                | —                | —                | —                | —                    | 8560×10 <sup>10 d</sup>   | —          |
| Missing (Others)               | 95%CI | —                | —                | —                | —                | —                | —                    | 0.0 <sup>d</sup>          | —          |
| Type of admission,             | OR    | 1.3 <sup>a</sup> | 1.7 <sup>a</sup> | 1.3              | 1.2              | 1.2              | 2.4                  | 0.0                       | 0.1        |
| Unplanned (Planned)            | 95%CI | 1.0-1.7          | 1.4-2.0          | 1.0-1.9          | 0.9-1.7          | 0.9-1.6          | 0.9-6.6              | 0.0                       | 0.0        |
| Type of admission,             | OR    | 0.0              | 2.2              | —                | —                | 0.0              | —                    | —                         | —          |
| Missing (Planned)              | 95%CI | 0.0              | 0.9-5.4          | —                | —                | 0.0              | —                    | —                         | —          |
| Emergency transport,           | OR    | 1.0              | 0.9              | 0.9              | 0.9              | 0.9              | 0.3                  | 0.4                       | —          |

|                            |       |                       |                  |                  |                  |                  |                   |                      |      |
|----------------------------|-------|-----------------------|------------------|------------------|------------------|------------------|-------------------|----------------------|------|
| Present (Absent)           | 95%CI | 0.7-1.4               | 0.7-1.1          | 0.7-1.3          | 0.2-3.9          | 0.6-1.3          | 0.0-1.9           | 0.0                  | —    |
| Emergency transport,       | OR    | 0.0                   | 0.5              | —                | —                | —                | —                 | —                    | —    |
| Missing (Absent)           | 95%CI | 0.0                   | 0.1-2.6          | —                | —                | —                | —                 | —                    | —    |
| Referral medical letter,   | OR    | 1.6 <sup>a</sup>      | —                | 1.5 <sup>a</sup> | 1.3              | 1.0              | 22.6 <sup>a</sup> | 1782×10 <sup>3</sup> | 38.5 |
| Present (Absent)           | 95%CI | 1.2-2.2               | —                | 1.0-2.3          | 0.9-1.7          | 0.8-1.4          | 7.5-68.4          | 0.0                  | 0.0  |
| Referral medical letter,   | OR    | 2378×10 <sup>10</sup> | —                | —                | —                | —                | —                 | —                    | —    |
| Missing (Absent)           | 95%CI | 0.0                   | —                | —                | —                | —                | —                 | —                    | —    |
| History of falls,          | OR    | 1.5 <sup>a</sup>      | 2.0 <sup>a</sup> | 1.7 <sup>a</sup> | 1.5 <sup>a</sup> | 1.2              | 1.4               | 14347                | 0.0  |
| Present (Absent)           | 95%CI | 1.1-2.0               | 1.7-2.4          | 1.1-2.4          | 1.0-2.1          | 0.8-1.9          | 0.3-6.9           | 0.0                  | 0.0  |
| Hypnotic usage,            | OR    | 0.8                   | 1.4 <sup>a</sup> | 1.6 <sup>a</sup> | 1.3              | 1.3              | 1.7               | 0.1                  | 33.0 |
| Using (Not using)          | 95%CI | 0.6-1.0               | 1.2-1.7          | 1.1-2.1          | 1.0-1.7          | 0.9-1.8          | 0.7-4.3           | 0.0                  | 0.0  |
| Hypnotic usage,            | OR    | —                     | —                | —                | —                | 0.4 <sup>a</sup> | —                 | —                    | —    |
| Missing (Not using)        | 95%CI | —                     | —                | —                | —                | 0.2-0.7          | —                 | —                    | —    |
| Antipsychotic drugs usage, | OR    | 2.6 <sup>a</sup>      | 2.0 <sup>a</sup> | 1.0              | 1.6 <sup>a</sup> | 1.0              | 2.0               | 0.0                  | 0.1  |
| Using (Not using)          | 95%CI | 1.9-3.4               | 1.6-2.5          | 0.7-1.6          | 1.2-2.0          | 0.7-1.5          | 0.7-5.6           | 0.0                  | 0.0  |
| Antipsychotic drugs usage, | OR    | —                     | —                | —                | —                | —                | —                 | —                    | —    |
| Missing (Not using)        | 95%CI | —                     | —                | —                | —                | —                | —                 | —                    | —    |
| Disturbance of             | OR    | 0.9                   | 1.0              | 1.3              | 1.0              | 1.3              | 0.9               | 1.2                  | 0.5  |

|                                         |       |                  |         |                  |                      |          |                   |                       |                      |
|-----------------------------------------|-------|------------------|---------|------------------|----------------------|----------|-------------------|-----------------------|----------------------|
| consciousness, Yes (No)                 | 95%CI | 0.7-1.3          | 0.8-1.3 | 0.8-2.3          | 0.7-1.5              | 0.9-1.9  | 0.4-2.2           | 0.0                   | 0.0                  |
| Disturbance of conscious-               | OR    | 2.2              | 0.9     | —                | 1.4 <sup>a</sup>     | 0.3      | —                 | —                     | —                    |
| ness, Missing (No)                      | 95%CI | 0.9-5.2          | 0.2-3.6 | —                | 1.0-2.0              | 0.0      | —                 | —                     | —                    |
| Visual impairment,                      | OR    | 0.9              | —       | 1.5 <sup>a</sup> | —                    | 0.8      | 63.4 <sup>a</sup> | 11676.9               | 6.1                  |
| Present (Absence)                       | 95%CI | 0.8-1.2          | —       | 1.1-2.1          | —                    | 0.6-1.1  | 7.0-579           | 0.0                   | 0.0                  |
| Visual impairment,                      | OR    | 1.8              | —       | —                | 1.0 <sup>b</sup>     | 0.0      | —                 | 1227×10 <sup>12</sup> | 1092×10 <sup>8</sup> |
| Missing (Absence)                       | 95%CI | 0.8-4.2          | —       | —                | 0.2-4.1 <sup>b</sup> | 0.0      | —                 | 0.0                   | 0.0                  |
| Ophthalmological disease <sup>b</sup> , | OR    | 0.9              | 1.1     | 0.2 <sup>a</sup> | 1.1                  | —        | 1.8               | 7696                  | 171.1                |
| Present (Absence)                       | 95%CI | 0.7-1.1          | 0.9-1.3 | 0.1-0.8          | 0.8-1.4              | —        | 0.2-15.0          | 0.0                   | 0.0                  |
| Ophthalmological disease <sup>b</sup> , | OR    | —                | —       | —                | —                    | —        | —                 | —                     | 0.0                  |
| Missing (Absence)                       | 95%CI | —                | —       | —                | —                    | —        | —                 | —                     | 0.0                  |
| Parkinsonism,                           | OR    | 1.3              | 0.6     | 2.6 <sup>a</sup> | 1.0                  | 1.2      | 1.4               | 2404×10 <sup>3</sup>  | —                    |
| Presence (Absence)                      | 95%CI | 0.8-2.3          | 0.3-1.2 | 1.3-5.5          | 0.5-1.9              | 0.5-3.1  | 0.2-10.7          | 0.0                   | —                    |
| Permanent damage by                     | OR    | 1.0              | 1.1     | 0.8              | 0.6                  | 0.9      | 1.0               | 0.0                   | 0.0                  |
| stroke, Present (Absence)               | 95%CI | 0.7-1.3          | 0.9-1.4 | 0.5-1.4          | 0.4-0.9              | 0.6-1.2  | 0.3-2.7           | 0.0                   | 0.0                  |
| Permanent damage by                     | OR    | —                | —       | —                | —                    | 4.0      | —                 | —                     | —                    |
| stroke, Missing (Absence)               | 95%CI | —                | —       | —                | —                    | 0.5-34.4 | —                 | —                     | —                    |
| Paraplegia and hemiplegia,              | OR    | 2.5 <sup>a</sup> | 1.0     | 0.0              | 0.3                  | 1.5      | 0.8               | 0.1                   | 1.5                  |

|                              |       |                  |                  |         |                  |                  |                   |                       |                      |
|------------------------------|-------|------------------|------------------|---------|------------------|------------------|-------------------|-----------------------|----------------------|
| Present (Absence)            | 95%CI | 1.5-4.3          | 0.3-3.4          | 0.0     | 0.1-1.2          | 0.4-6.8          | 0.3-2.3           | 0.0                   | 0.0                  |
| Diabetes mellitus,           | OR    | 1.5 <sup>a</sup> | 1.2 <sup>a</sup> | 1.0     | 1.3 <sup>a</sup> | 1.2              | 8.7 <sup>a</sup>  | 0.0                   | 0.0                  |
| Present (Absent)             | 95%CI | 1.2-1.8          | 1.0-1.4          | 0.7-1.3 | 1.0-1.6          | 0.8-1.7          | 2.7-27.9          | 0.0                   | 0.0                  |
| Frequent urination,          | OR    | 0.9              | 1.1              | 1.2     | —                | —                | 89.1 <sup>a</sup> | 0.0                   | 9171×10 <sup>2</sup> |
| Present (Absent)             | 95%CI | 0.7-1.0          | 0.9-1.3          | 0.8-2.0 | —                | —                | 28.5-279          | 0.0                   | 0.0                  |
| Frequent urination,          | OR    | 0.7              | 0.9              | —       | —                | —                | —                 | —                     | —                    |
| Missing (Absent)             | 95%CI | 0.5-0.9          | 0.7-1.1          | —       | —                | —                | —                 | —                     | —                    |
| Eating, Requiring assistance | OR    | 1.5 <sup>a</sup> | 1.7 <sup>a</sup> | 1.3     | 1.0              | 1.2              | 0.6               | 0.0                   | 11.3                 |
| (Independent)                | 95%CI | 1.1-2.0          | 1.4-2.1          | 0.9-1.8 | 0.8-1.3          | 0.8-1.8          | 0.2-1.9           | 0.0                   | 0.0                  |
| Eating, Missing category     | OR    | 2.2              | 1.8 <sup>a</sup> | 0.0     | 0.0              | 0.3              | —                 | —                     | —                    |
| (Independent)                | 95%CI | 0.7-7.2          | 1.1-2.9          | 0.0     | 0.0              | 0.0-2.5          | —                 | —                     | —                    |
| Swallowing, Requiring as-    | OR    | 2.0 <sup>a</sup> | 1.1              | —       | 1.9 <sup>a</sup> | 1.7 <sup>a</sup> | 3.2               | 6774×10 <sup>4</sup>  | 0.0                  |
| sistance (Independent)       | 95%CI | 1.1-3.8          | 0.8-1.7          | —       | 1.3-2.8          | 1.1-2.5          | 1.0-10.3          | 0.0                   | 0.0                  |
| Swallowing, Missing          | OR    | 1.0              | 0.0              | —       | —                | 2.7              | —                 | —                     | —                    |
| (Independent)                | 95%CI | 0.5-1.7          | 0.0              | —       | —                | 0.6-10.9         | —                 | —                     | —                    |
| Body Mass Index,             | OR    | 1.2              | 1.0              | 0.9     | 1.1              | —                | —                 | 8560×10 <sup>10</sup> | 0.4                  |
| ≥18.5 and <25 (<18.5)        | 95%CI | 0.9-1.5          | 0.8-1.2          | 0.6-1.3 | 0.8-1.6          | —                | —                 | 0.0                   | 0.0                  |
| Body Mass Index,             | OR    | 1.0              | 1.0              | 1.2     | 1.1              | —                | —                 | —                     | 0.9                  |

|                           |       |                                 |                                 |                      |                      |                  |          |                    |                    |
|---------------------------|-------|---------------------------------|---------------------------------|----------------------|----------------------|------------------|----------|--------------------|--------------------|
| $\geq 25$ (<18.5)         | 95%CI | 0.7-1.4                         | 0.8-1.2                         | 0.8-1.8              | 0.8-1.7              | —                | —        | —                  | 0.0                |
| Body Mass Index,          | OR    | 1.3                             | 0.0                             | 0.7                  | 1.3                  | —                | —        | —                  | —                  |
| Missing (<18.5)           | 95%CI | 0.8-2.1                         | 0.0                             | 0.1-5.2              | 0.9-1.9              | —                | —        | —                  | —                  |
| Bedriddenness rank,       | OR    | $1155 \times 10^4$ <sup>c</sup> | $8822 \times 10^3$ <sup>c</sup> | —                    | —                    | 1.6              | 3.2      | 0.0                | 0.4                |
| J (Normal)                | 95%CI | 0.0                             | 0.0                             | —                    | —                    | 0.8-3.3          | 0.1-74.6 | 0.0                | 0.0                |
| Bedriddenness rank,       | OR    | $2429 \times 10^4$ <sup>c</sup> | $1598 \times 10^4$ <sup>c</sup> | 2.5 <sup>ad</sup>    | 2.5 <sup>ad</sup>    | 3.1 <sup>a</sup> | 0.4      | 0.0                | 0.8                |
| A (Normal)                | 95%CI | 0.0                             | 0.0                             | 1.5-4.2 <sup>d</sup> | 1.9-3.4 <sup>d</sup> | 1.7-5.4          | 0.0-8.4  | 0.0                | 0.0                |
| Bedriddenness rank,       | OR    | $3133 \times 10^4$ <sup>c</sup> | $1667 \times 10^4$ <sup>c</sup> | 3.3 <sup>ad</sup>    | 2.3 <sup>ad</sup>    | 3.2 <sup>a</sup> | 0.4      | 0.0                | 2847               |
| B (Normal)                | 95%CI | 0.0                             | 0.0                             | 2.0-5.5 <sup>d</sup> | 1.6-3.2 <sup>d</sup> | 1.7-5.8          | 0.0-6.1  | 0.0                | 0.0                |
| Bedriddenness rank,       | OR    | $1646 \times 10^4$ <sup>c</sup> | $9887 \times 10^3$ <sup>c</sup> | 2.4 <sup>ad</sup>    | 1.5 <sup>ad</sup>    | 1.3              | 0.7      | 0.0                | $1425 \times 10^9$ |
| C (Normal)                | 95%CI | 0.0                             | 0.0                             | 1.4-4.0 <sup>d</sup> | 1.0-2.1 <sup>d</sup> | 0.7-2.7          | 0.0-12.8 | 0.0                | 0.0                |
| Bedriddenness rank,       | OR    | $1105 \times 10^4$ <sup>c</sup> | $1087 \times 10^4$ <sup>c</sup> | 1.5 <sup>d</sup>     | 1.1 <sup>d</sup>     | 8.2              | —        | 0.0                | —                  |
| Missing (Normal)          | 95%CI | 0.0                             | 0.0                             | 0.9-2.4 <sup>d</sup> | 0.5-2.2 <sup>d</sup> | 0.0              | —        | 0.0                | —                  |
| Cognitive function score, | OR    | 1.4                             | 1.2                             | 1.2                  | 1.0                  | 1.8 <sup>a</sup> | 2.0      | 0.2                | 0.0                |
| 1 (Normal)                | 95%CI | 1.0-1.9                         | 0.9-1.6                         | 0.8-1.7              | 0.6-1.5              | 1.1-2.9          | 0.2-16.3 | 0.0                | 0.0                |
| Cognitive function score, | OR    | 1.3                             | 0.9                             | 0.9                  | 2.2 <sup>a</sup>     | 1.2              | 0.5      | 0.0                | 0.0                |
| 2 (Normal)                | 95%CI | 0.8-2.1                         | 0.6-1.3                         | 0.6-1.5              | 1.4-3.4              | 0.7-2.1          | 0.1-3.7  | 0.0                | 0.0                |
| Cognitive function score, | OR    | 1.7                             | 1.2                             | 0.9                  | 2.1 <sup>a</sup>     | 1.4              | 0.5      | $1431 \times 10^2$ | $4180 \times 10^3$ |

|                                    |       |         |         |         |                  |         |         |                      |      |
|------------------------------------|-------|---------|---------|---------|------------------|---------|---------|----------------------|------|
| 3 (Normal)                         | 95%CI | 1.0-2.9 | 0.8-1.8 | 0.5-1.6 | 1.5-2.8          | 0.8-2.5 | 0.1-3.3 | 0.0                  | 0.0  |
| Cognitive function score,          | OR    | 0.8     | 0.5     | 0.2     | 2.2 <sup>a</sup> | 1.3     | 0.2     | 33.6                 | 0.2  |
| 4 (Normal)                         | 95%CI | 0.3-2.3 | 0.2-1.1 | 0.6-1.0 | 1.4-3.6          | 0.5-3.6 | 0.0-1.4 | 0.0                  | 0.0  |
| Cognitive function score,          | OR    | 2.0     | 0.4     | 0.0     | 0.9              | 0.0     | 0.2     | 5266×10 <sup>8</sup> | 28.3 |
| M and Missing category<br>(Normal) | 95%CI | 0.6-6.5 | 0.2-0.9 | 0.0     | 0.7-1.2          | 0.0     | 0.0-3.9 | 0.0                  | 0.0  |

OR, odds ratio; CI, confidence interval. The factors used in the multivariate logistic regression were all assessable at admission and had low collinearity with each other.

<sup>a</sup> Representative OR of  $p < 0.05$

<sup>b</sup> Presence was used as the criterion for analysis because there were no participants in the no visual impairment category.

<sup>c</sup> The categories as a whole, but not significantly different in the category constructs

<sup>d</sup> Data from hospitals with no bedriddenness ranks were analyzed using J or J1 as the criterion
